# Supplementary material
Source: ML conference proceedings conference paper supplement (https://openreview.net/forum?id=9q4L2odBPh)
Supplement: supplementary_material [file supplementary_material.pdf › supplementary_material.pdf]

## Additional Qualitative Results at $512^2$ resolution

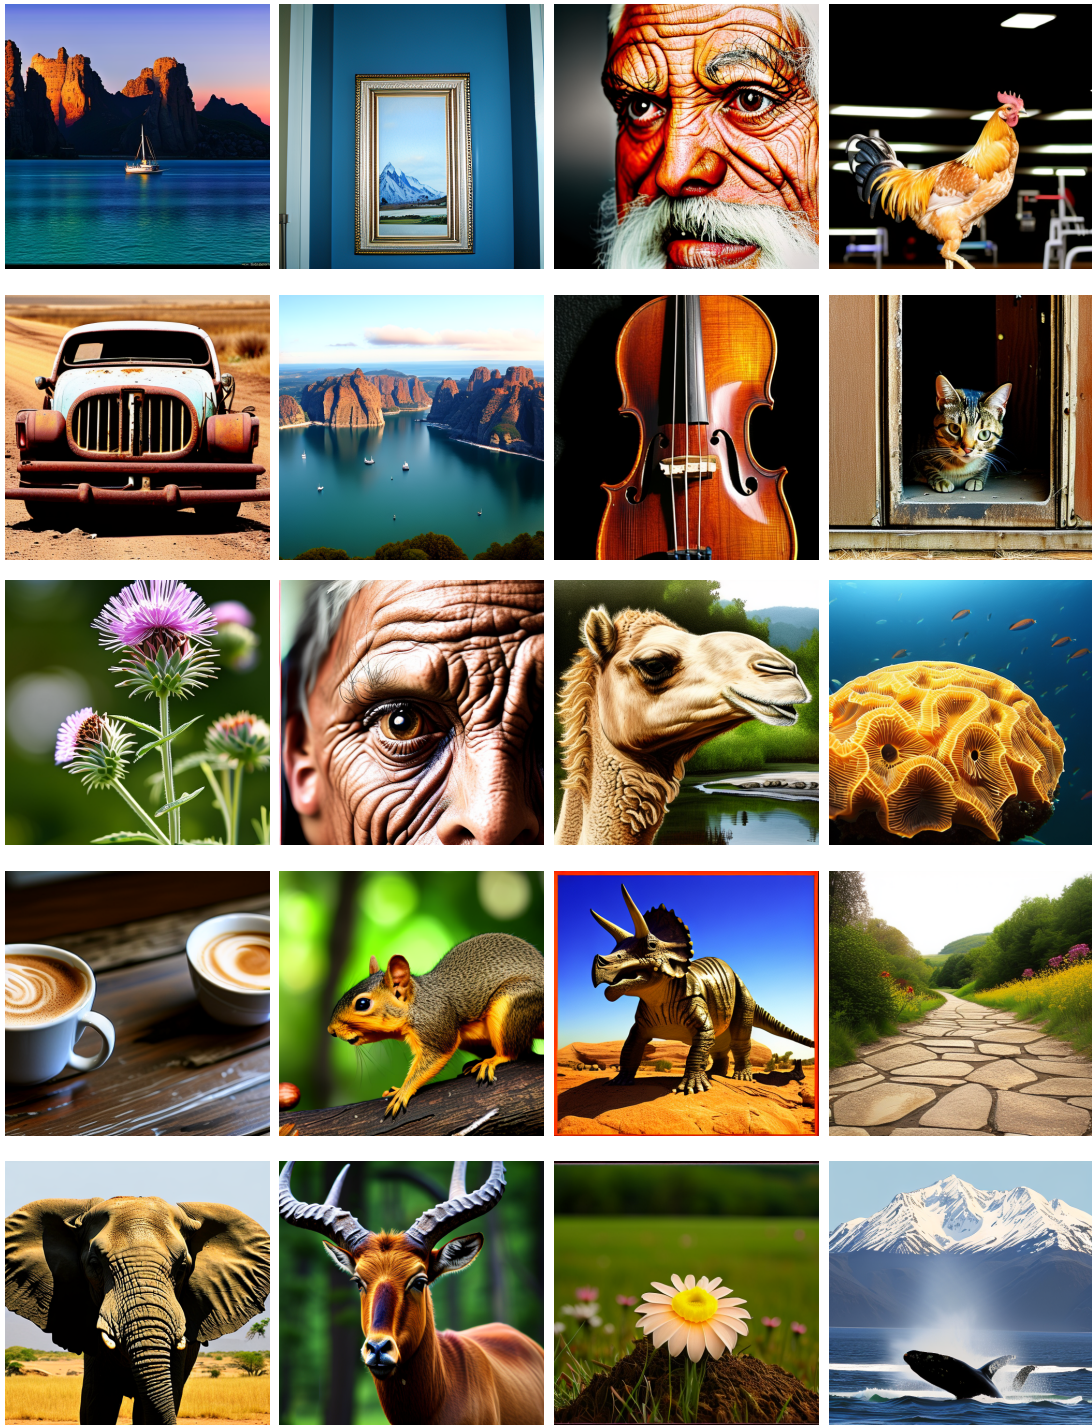

Figure: Additional Qualitative Results at  $512^2$  resolution
